# Supplementary material for: Cascade charge transfer mediated by in situ interface modulation toward solar hydrogen production
Source: Royal Society of Chemistry journal article supplement (doi:10.1039/c9ta01144g), 2019-01-01
Supplement: c9ta01144g1.pdf [file c9ta01144g1.pdf]

## Supporting Information

# Cascade Charge Transfer Mediated by *In-situ* Interface Modulation Toward Solar Hydrogen Production

Yu-Bing Li,<sup>a</sup> Tao Li,<sup>a</sup> Xiao-Cheng Dai,<sup>a</sup> Ming-Hui Huang,<sup>a</sup> Yunhui He,<sup>b</sup> Guangcan Xiao,<sup>b</sup> Fang-

Xing Xiao<sup>a\*</sup>

a. College of Materials Science and Engineering, Fuzhou University, New Campus,

Minhou, Fujian Province 350108, China.

b. Instrumental Measurement and Analysis Center, Fuzhou University, Fuzhou, 350002,

People's Republic of China.

E-mail: [fx Xiao@fzu.edu.cn](mailto:fx Xiao@fzu.edu.cn)

## Table of contents

### Page NO.

|                                                                                                                                 |     |
|---------------------------------------------------------------------------------------------------------------------------------|-----|
| <b>Figure S1.</b> Zeta potentials of APTMS-CdS@CdSe (25 °C).....                                                                | S1  |
| <b>Figure S2.</b> Zeta potentials of MoS <sub>2</sub> QDs.....                                                                  | S1  |
| <b>Figure S3.</b> Zeta potentials of APTMS-CdS.....                                                                             | S2  |
| <b>Figure S4.</b> TEM image of MoS <sub>2</sub> QDs and size distribution histogram.....                                        | S2  |
| <b>Figure S5.</b> UV-vis absorption spectrum of MoS <sub>2</sub> QDs.....                                                       | S3  |
| <b>Figure S6.</b> Raman spectra of pristine CdS and CdS@CdSe (25 °C).....                                                       | S3  |
| <b>Figure S7.</b> Photocatalytic H <sub>2</sub> evolution rate of CdS.....                                                      | S6  |
| <b>Figure S8.</b> Sample colors of CdS@CdSe (25, 50,90 °C).....                                                                 | S6  |
| <b>Figure S9.</b> Photocatalytic H <sub>2</sub> evolution performances of CdS-X mL MoS <sub>2</sub> QDs.....                    | S7  |
| <b>Figure S10.</b> Photocatalytic H <sub>2</sub> evolution performances of CdS@CdSe-6M (25 °C) (different light intensity)..... | S7  |
| <b>Figure S11.</b> Apparent Quantum yield (A.Q.Y) of CdS@CdSe-6M (25 °C).....                                                   | S8  |
| <b>Figure S12.</b> XRD and FTIR of CdS@CdSe-6M (25 °C) before and after cyclic reaction.....                                    | S10 |
| <b>Figure S13.</b> Charge carrier density (N <sub>D</sub> ) of three samples.....                                               | S10 |
| <b>Table S1.</b> Peak positions with corresponding functional groups of three samples.....                                      | S4  |
| <b>Table S2.</b> Summary of specific surface area, pore volume and pore size of three samples.....                              | S4  |
| <b>Table S3.</b> Chemical bond species vs. B.E. for three samples.....                                                          | S5  |
| <b>Table S4.</b> Apparent Quantum yield (A.Q.Y) of CdS@CdSe-6M (25 °C).....                                                     | S8  |
| <b>Table S5.</b> Solar-to-hydrogen conversion efficiency (S.T.H) of CdS@CdSe-6M (25 °C).....                                    | S9  |
| <b>References</b> .....                                                                                                         | S11 |
| <b>Note:</b> The three samples are referred to pristine CdS NWs, CdS@CdSe (25 °C) and CdS@CdSe-6M (25 °C), respectively.        |     |

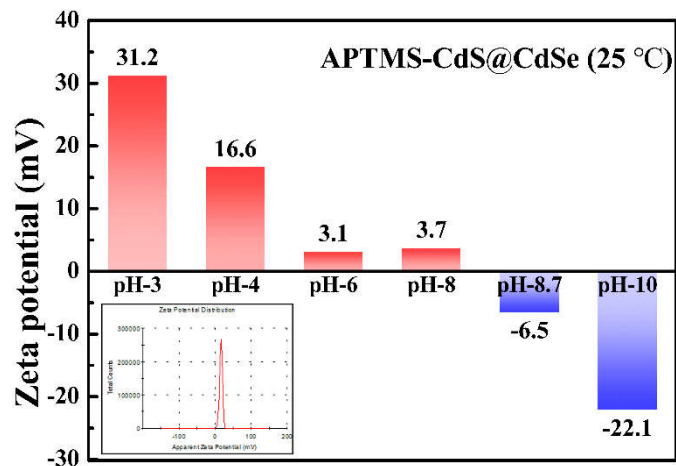

Fig. S1. Zeta potentials of APTMS modified-CdS@CdSe (25 °C) as a function of pH value.

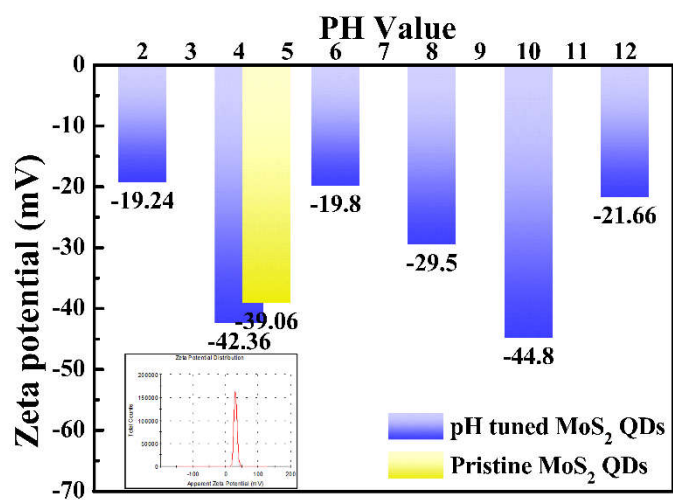

Fig. S2. Zeta potentials of MoS<sub>2</sub> QDs as a function of pH value.

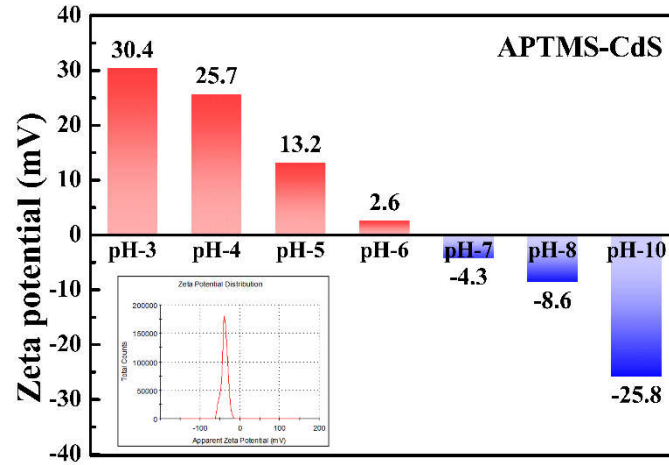

**Fig. S3.** Zeta potentials of APTMS modified CdS NWs as a function of pH value.

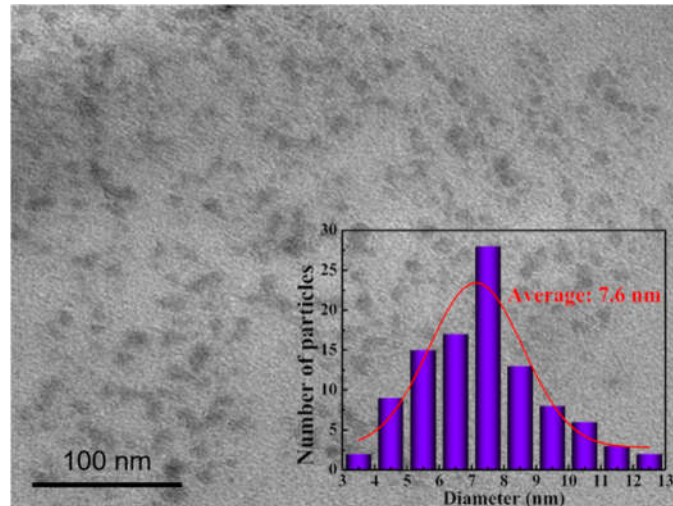

**Fig. S4.** TEM image of MoS<sub>2</sub> QDs with corresponding size distribution histogram in the inset.

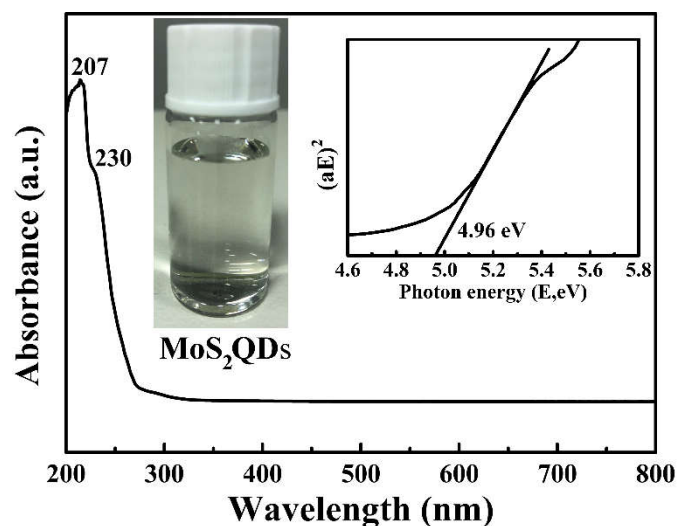

**Fig. S5.** UV-vis absorption spectrum of MoS<sub>2</sub> QD aqueous solution with corresponding photograph and band-gap energy in the insets.

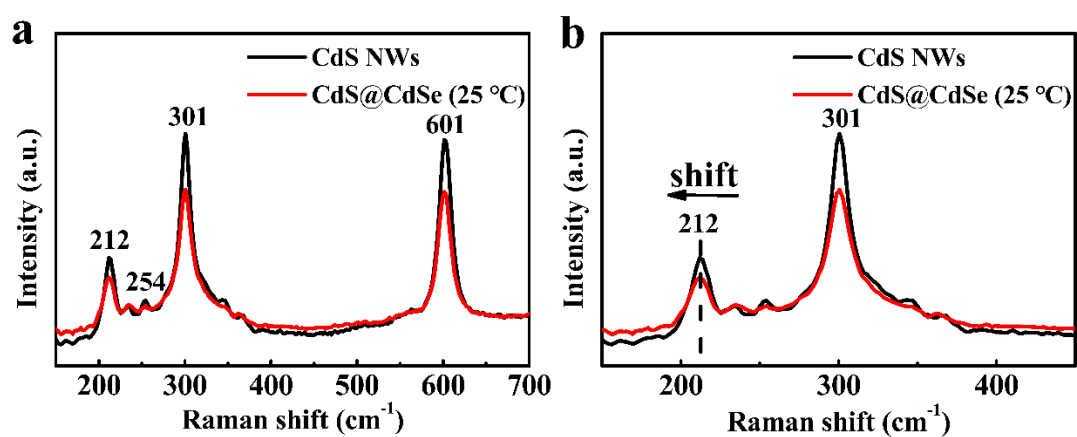

**Fig. S6.** (a) Raman spectra of pristine CdS NWs and CdS@CdSe (25 °C) with (b) magnified view.

**Table. S1** Peak position with corresponding functional groups.

| <i>Peak position (cm<sup>-1</sup>)</i> | <i>Vibration mode</i>                          |
|----------------------------------------|------------------------------------------------|
| 3420                                   | N-H stretching vibration                       |
| 2925                                   | C-H stretching vibration                       |
| 1635                                   | N-H deformation vibration                      |
| 1465                                   | CH <sub>2</sub> deformation vibration          |
| 1377                                   | CH <sub>3</sub> deformation vibration          |
| 1055                                   | Si-O <sup>Si</sup> , C-N stretching vibrations |

**Table. S2** Summary of the specific surface area, pore volume and pore size of blank CdS NWs, CdS@CdSe (25 °C) and CdS@CdSe-6M (25 °C).

| <i>Samples</i> | <i>S<sub>BET</sub></i><br><i>(m<sup>2</sup> g<sup>-1</sup>)<sup>a</sup></i> | <i>Total pore volume</i><br><i>(cm<sup>3</sup> g<sup>-1</sup>)<sup>b</sup></i> | <i>Average pore size</i><br><i>(nm)<sup>c</sup></i> |
|----------------|-----------------------------------------------------------------------------|--------------------------------------------------------------------------------|-----------------------------------------------------|
| CdS NWs        | 6.99                                                                        | 0.031                                                                          | 17.68                                               |
| CdS@CdSe       | 15.01                                                                       | 0.027                                                                          | 7.42                                                |
| CdS@CdSe-6M    | 16.26                                                                       | 0.030                                                                          | 7.35                                                |

<sup>a</sup> BET surface area is calculated from the linear part of the BET plot.

<sup>b</sup> Single point total pore volume of the pores at P/P<sub>0</sub> = 0.99.

<sup>c</sup> Adsorption average pore width (4V/A by BET).

**Table. S3** Chemical bond species vs. B.E. for different samples.

| <i>Element</i>             | <i>CdS</i> | <i>CdS@CdSe (25 °C)</i> | <i>CdS@CdSe-6M (25 °C)</i> | <i>Chemical Bond Species</i>     |
|----------------------------|------------|-------------------------|----------------------------|----------------------------------|
| <b>C 1s A</b>              | 284.60     | 284.60                  | 284.60                     | C-C/C-H                          |
| <b>Cd 3d<sub>5/2</sub></b> | 404.15     | 404.95                  | 404.80                     | Cd <sup>2+</sup> S <sup>2-</sup> |
| <b>Cd 3d<sub>3/2</sub></b> | 410.90     | 411.75                  | 411.50                     | Cd <sup>2+</sup>                 |
| <b>S 2p<sub>3/2</sub></b>  | 160.55     | 161.33                  | 161.10                     | S <sup>2-</sup> S <sup>3-</sup>  |
| <b>S 2p<sub>1/2</sub></b>  | 161.70     | 162.75                  | 162.35                     | S <sup>2-</sup>                  |
| <b>Se 3d</b>               | N.D.       | N.D.                    | 54.30                      | Se <sup>2-</sup> S <sup>4-</sup> |
| <b>Mo 3d<sub>5/2</sub></b> | N.D.       | N.D.                    | 228.07                     | Mo <sup>4+</sup> S <sup>5-</sup> |
| <b>Mo 3d<sub>3/2</sub></b> | N.D.       | N.D.                    | 232.06                     | Mo <sup>4+</sup>                 |

N.D.: Not Detected.

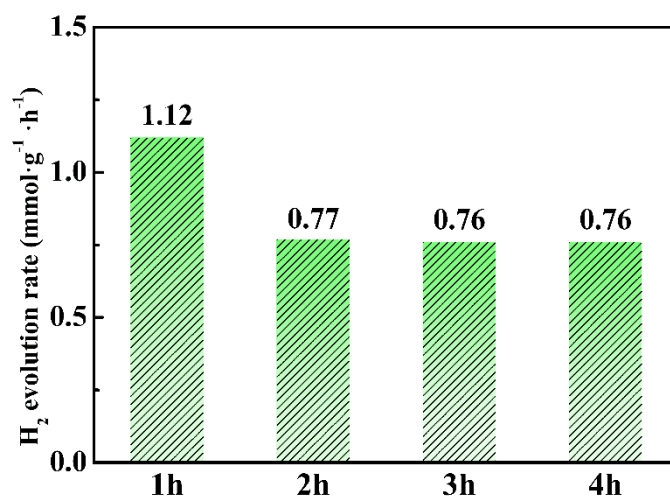

**Fig. S7.** Photocatalytic H<sub>2</sub> evolution rate of pristine CdS NWs under visible light irradiation ( $\lambda > 420$  nm).

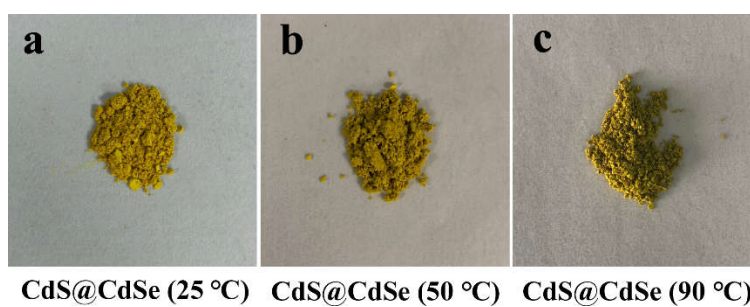

**Fig. S8.** Sample color of CdS@CdSe prepared at different temperature (25, 50, 90 °C) for triggering *in-situ* phase self-transformation.



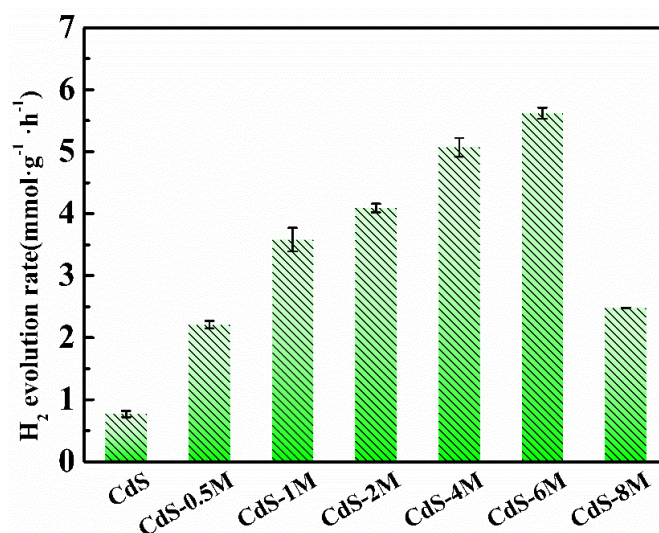

**Fig. S9.** Photocatalytic H<sub>2</sub> evolution performances of blank CdS NWs and CdS-X MoS<sub>2</sub> (X=0, 0.5, 1, 2, 4, 6, 8 mL) nanocomposites with different adding volumes of MoS<sub>2</sub> QDs under visible light irradiation ( $\lambda > 420$  nm).

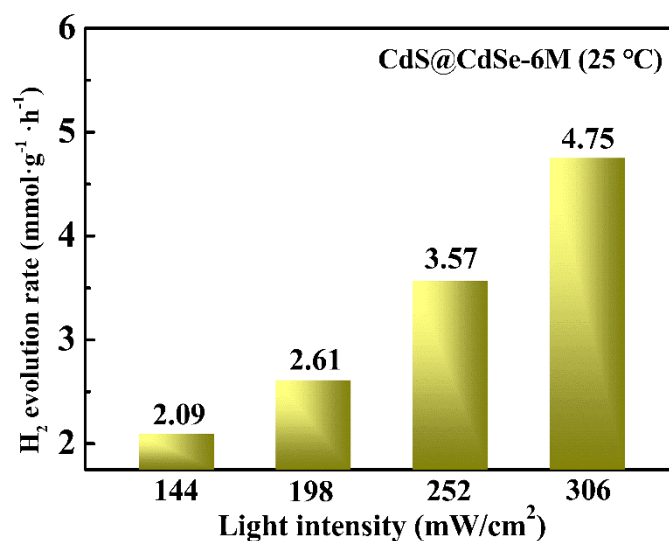

**Fig. S10.** Photocatalytic H<sub>2</sub> evolution rates of CdS@CdSe-6M (25 °C) under visible light irradiation ( $\lambda > 420$  nm) with different light intensity (144, 198, 252, 306 mW/cm<sup>2</sup>).

**Note:** Fig. S10 demonstrates that hydrogen production rate increases when the light irradiation intensity gradually boosts, suggesting hydrogen production reaction occurring over CdS@CdSe-6M (25 °C) is indeed caused by a photocatalytic process.

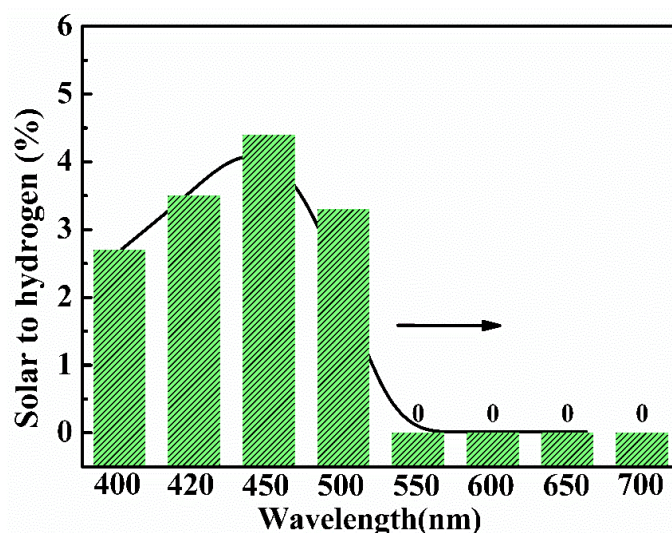

**Fig. S11.** Apparent Quantum yield (A.Q.Y) of CdS@CdSe-6M (25 °C) under different monochromatic wavelengths.

**Table. S4** A.Q.Y of CdS@CdSe-6M (25 °C) and pristine CdS NWs at 450 nm.

| <i>Photocatalyst</i>       | <i>Light source</i> | <i>Activity (<math>\mu\text{mol}\cdot\text{h}^{-1}</math>)</i> | <i>AQY (%)</i> |
|----------------------------|---------------------|----------------------------------------------------------------|----------------|
| <b>CdS@CdSe-6M (25 °C)</b> | 400nm               | 9.70                                                           | 2.7            |
|                            | 420nm               | 12.9                                                           | 3.5            |
|                            | 450nm               | 20.7                                                           | 4.4            |
|                            | 500nm               | 17.2                                                           | 3.3            |
|                            | 550nm               | 0                                                              | 0              |
|                            | 600nm               | 0                                                              | 0              |
|                            | 650nm               | 0                                                              | 0              |
|                            | 700nm               | 0                                                              | 0              |
| <b>CdS</b>                 | 450nm               | 3.49                                                           | 0.74           |

**Table. S5** S.T.H. of CdS@CdSe-6M (25 °C) and pristine CdS NWs at 450 nm.

| <i>Photocatalyst</i>       | <i>Light source</i> | <i>Activity (mmol·g<sup>-1</sup>·h<sup>-1</sup>)</i> | <i>S.T.H (%)</i> |
|----------------------------|---------------------|------------------------------------------------------|------------------|
| <b>CdS@CdSe-6M (25 °C)</b> | 400nm               | 0.97                                                 | 26.4             |
|                            | 420nm               | 1.29                                                 | 36.2             |
|                            | 450nm               | 2.07                                                 | 48.7             |
|                            | 500nm               | 1.72                                                 | 40.4             |
|                            | 550nm               | 0                                                    | 0                |
|                            | 600nm               | 0                                                    | 0                |
|                            | 650nm               | 0                                                    | 0                |
|                            | 700nm               | 0                                                    | 0                |
| <b>CdS</b>                 | 450nm               | 0.349                                                | 8.22             |

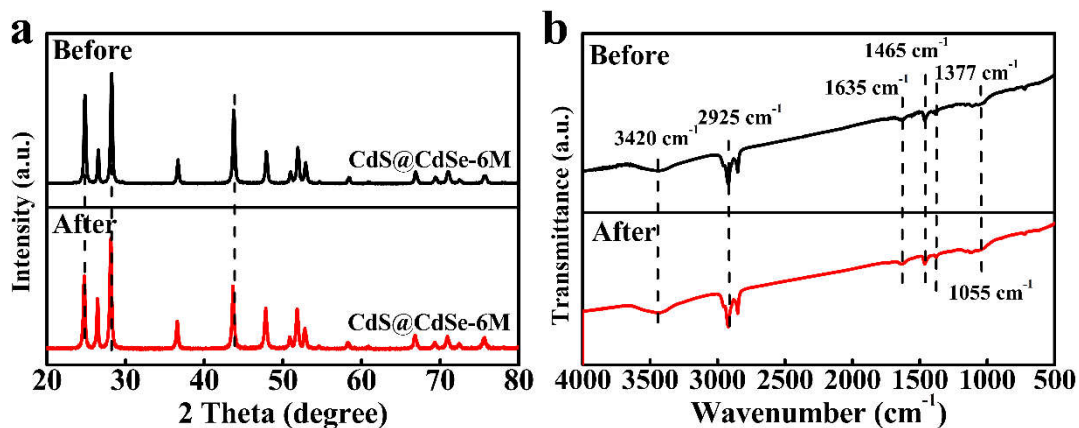

**Fig. S12.** XRD patterns (a) and FTIR spectra (b) of CdS@CdSe-6M (25 °C) before and after cyclic photocatalytic H<sub>2</sub> evolution reactions under visible light irradiation (16 h,  $\lambda > 420$  nm).

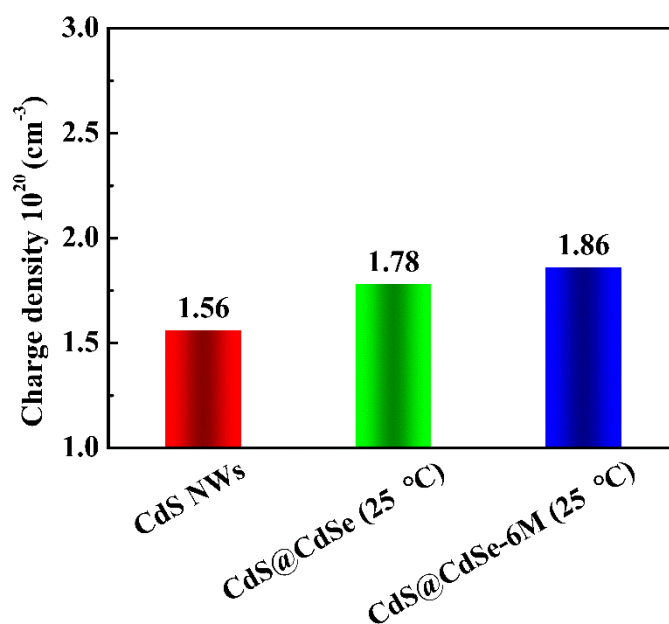

**Fig. S13.** Charge carrier density ( $N_D$ ) of blank CdS NWs, CdS@CdSe (25 °C) and CdS@CdSe-6M (25 °C).

## References

- S1. N. Sadati Behbahani, K. Rostamizadeh, M. R. Yaftian, A. Zamani and H. Ahmadi, *J. Environ. Health Sci. Eng.*, 2014, **12**, 103.
- S2. P. R. Nikam, P. K. Baviskar, J. V. Sali, K. V. Gurav, J. H. Kim and B. R. Sankapal, *J. Alloy. Compd.*, 2016, **689**, 394-400.
- S3. Z. Yan, X. Yu, A. Han, P. Xu and P. Du, *J. Phys. Chem. C.*, 2014, **118**, 22896-22903.
- S4. J. E. B. Katari, V. L. Colvin and A. P. Alivisatos, *J. Phys. Chem.*, 1994, **98**, 4109-4117.
- S5. C. Liu, L. Wang, Y. Tang, S. Luo, Y. Liu, S. Zhang, Y. Zeng and Y. Xu, *Appl. Catal. B-Environ.*, 2015, **164**, 1-9.
